# Supplementary material for: Comparative Phylogeography Reveals Cryptic Diversity and Repeated Patterns of Cladogenesis for Amphibians and Reptiles in Northwestern Ecuador
Source: PubMed Central journal article supplement (PMC4847877; doi:10.1371/journal.pone.0151746), 2016-04-27

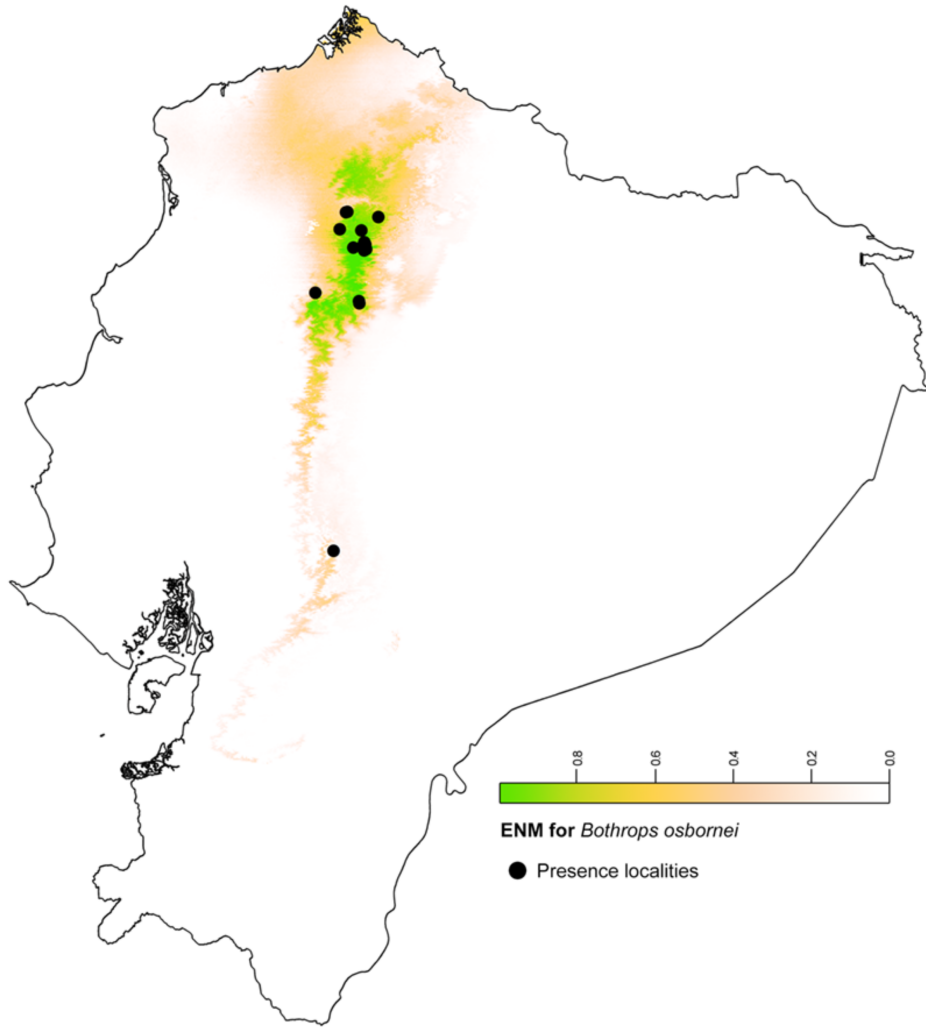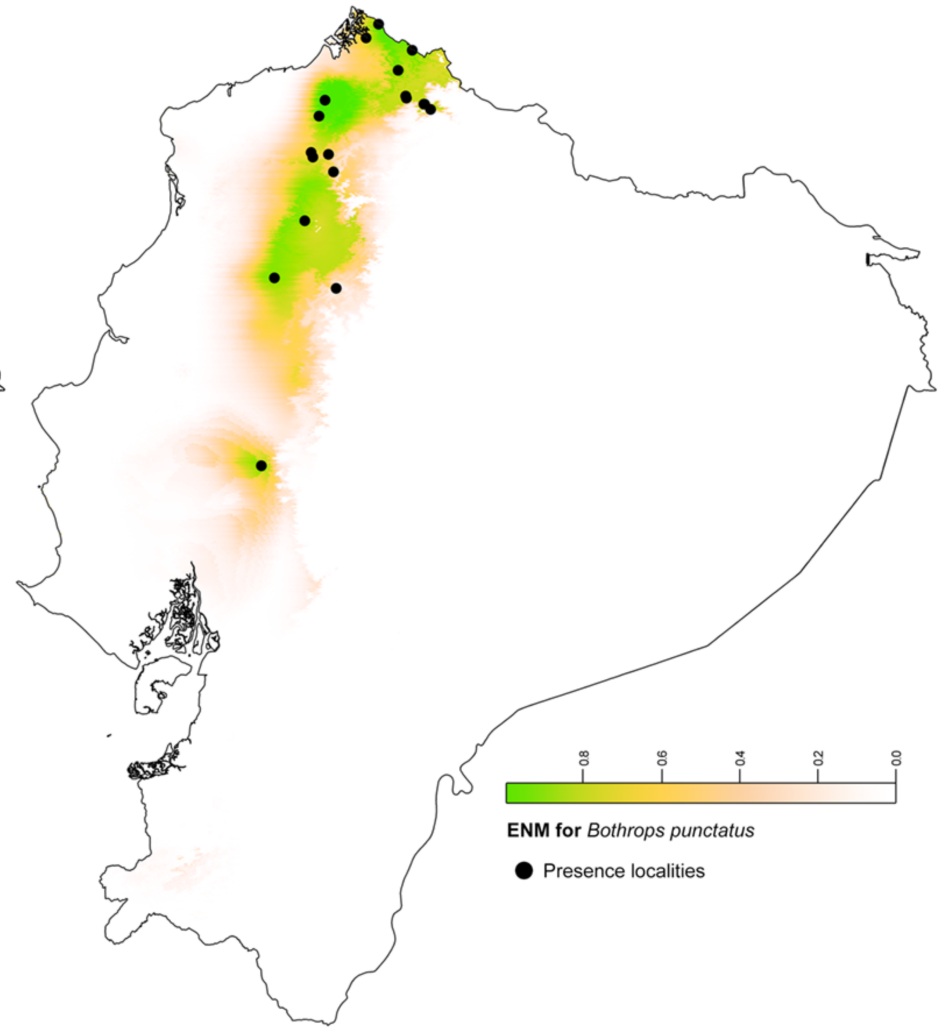

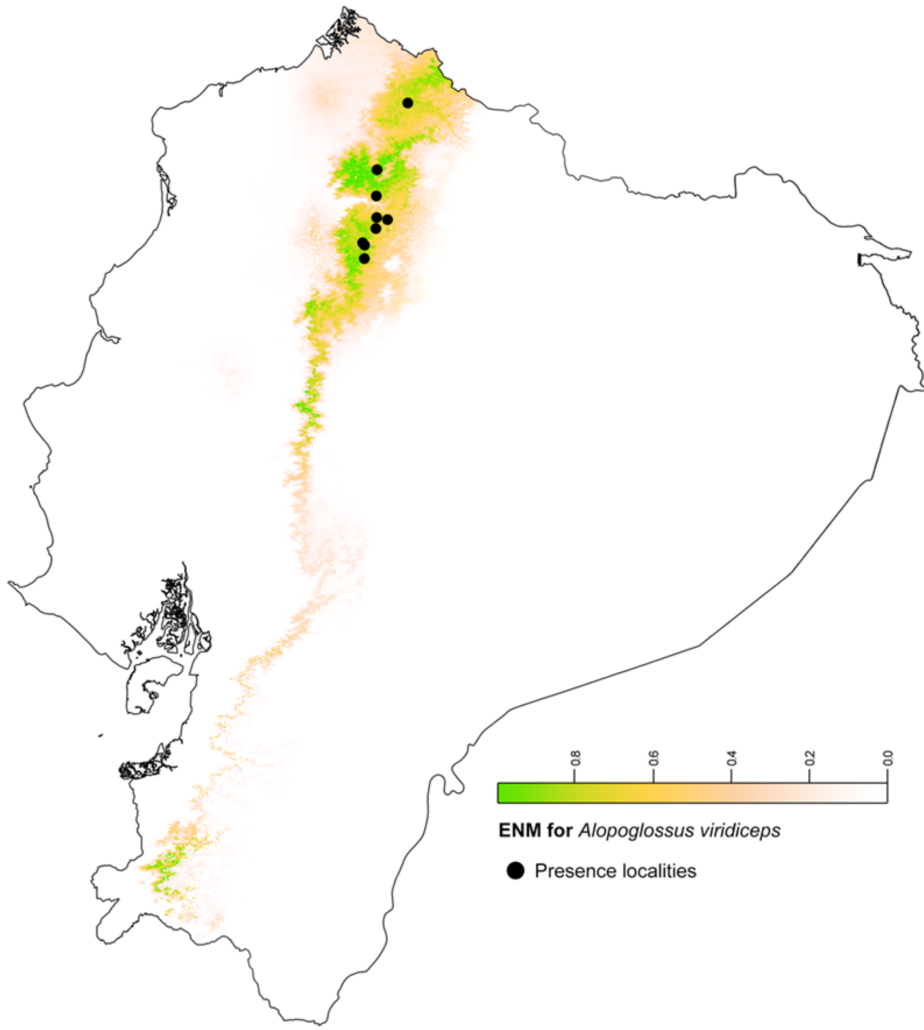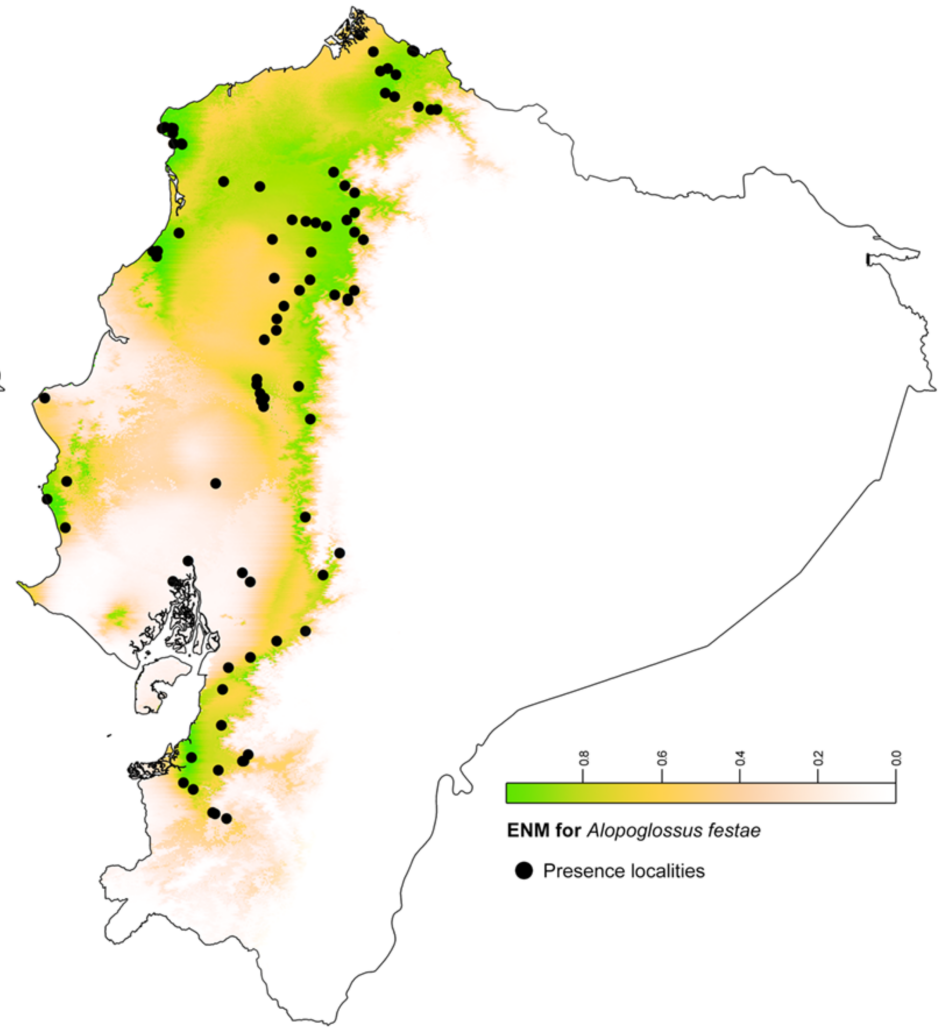

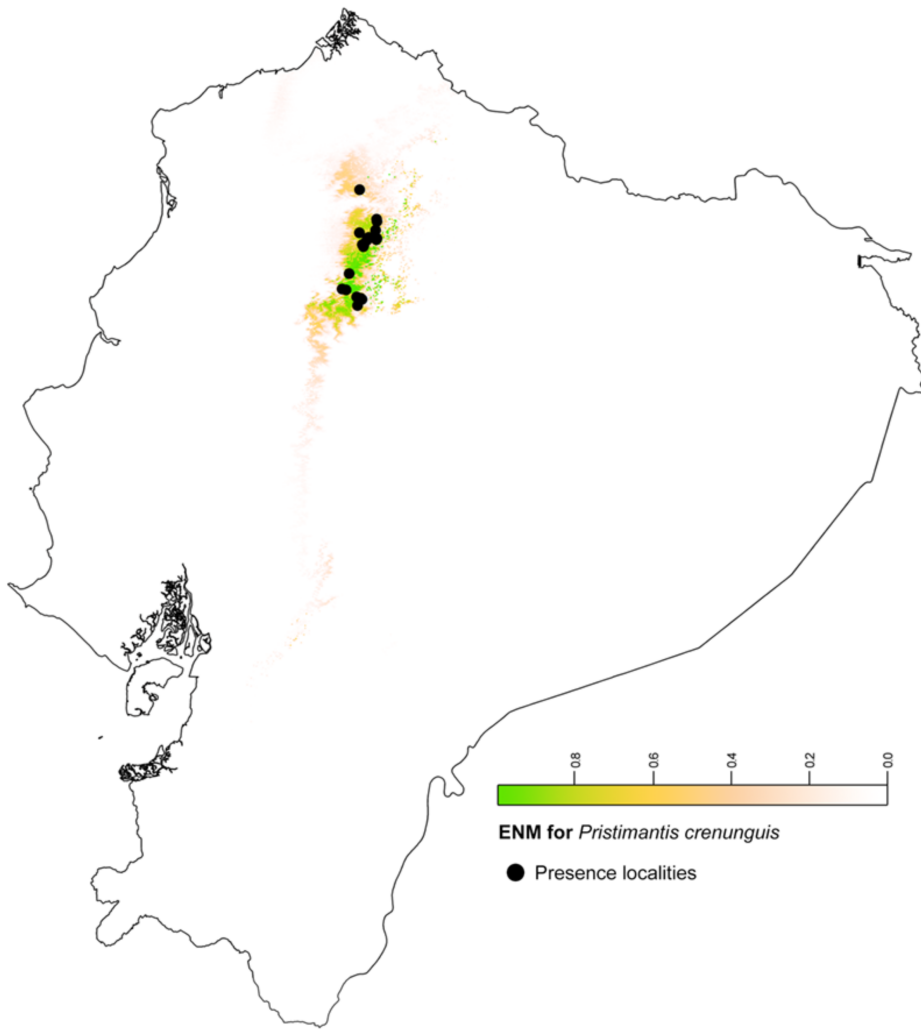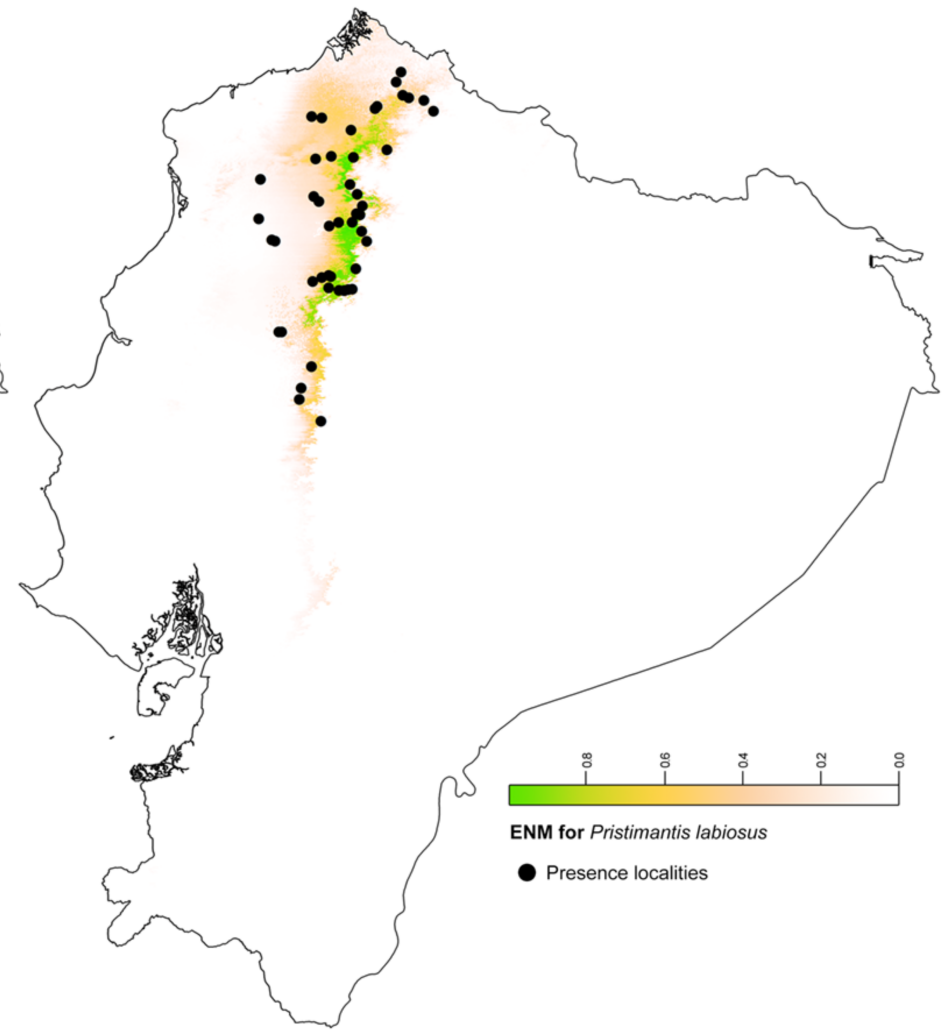

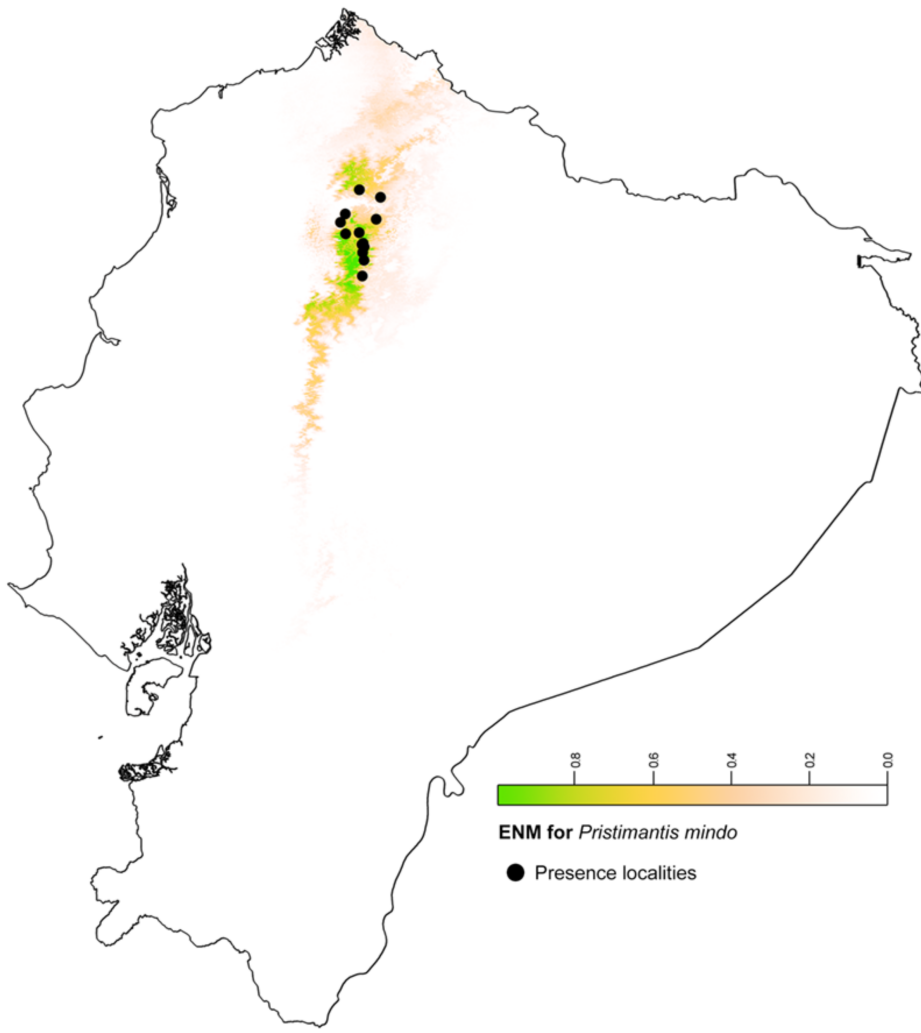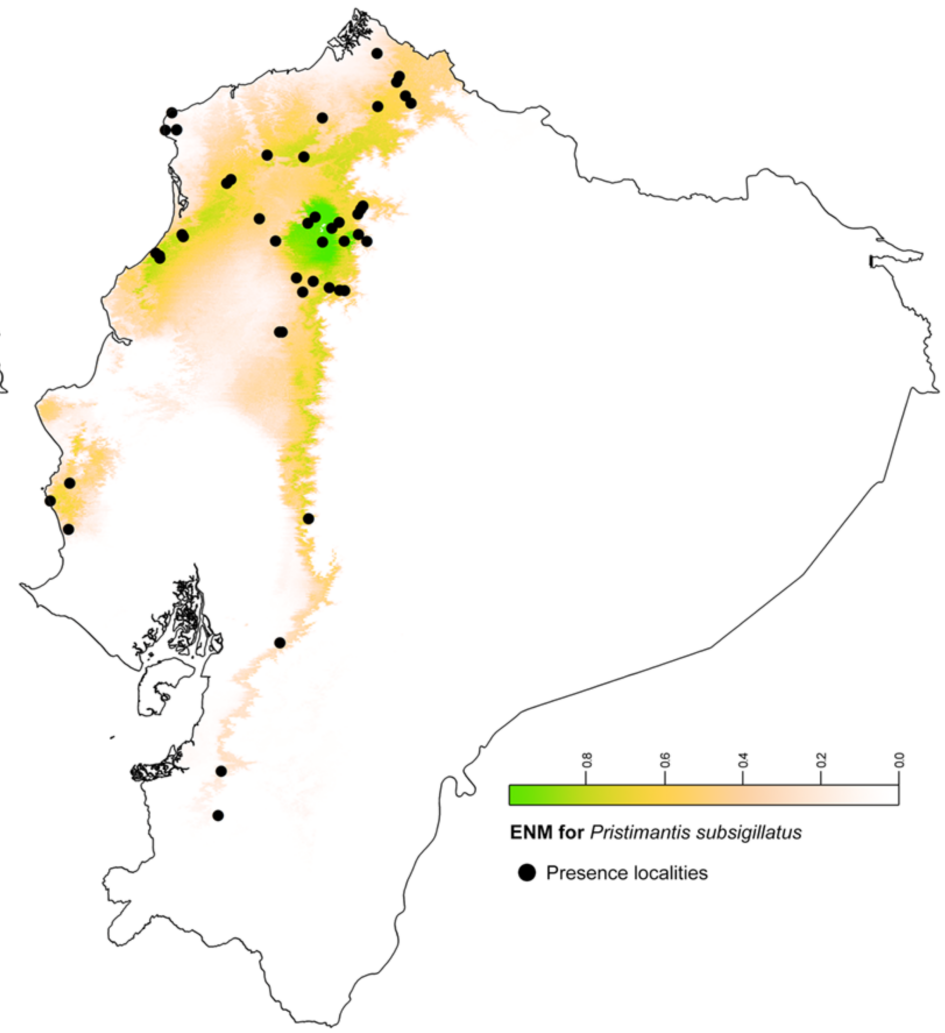

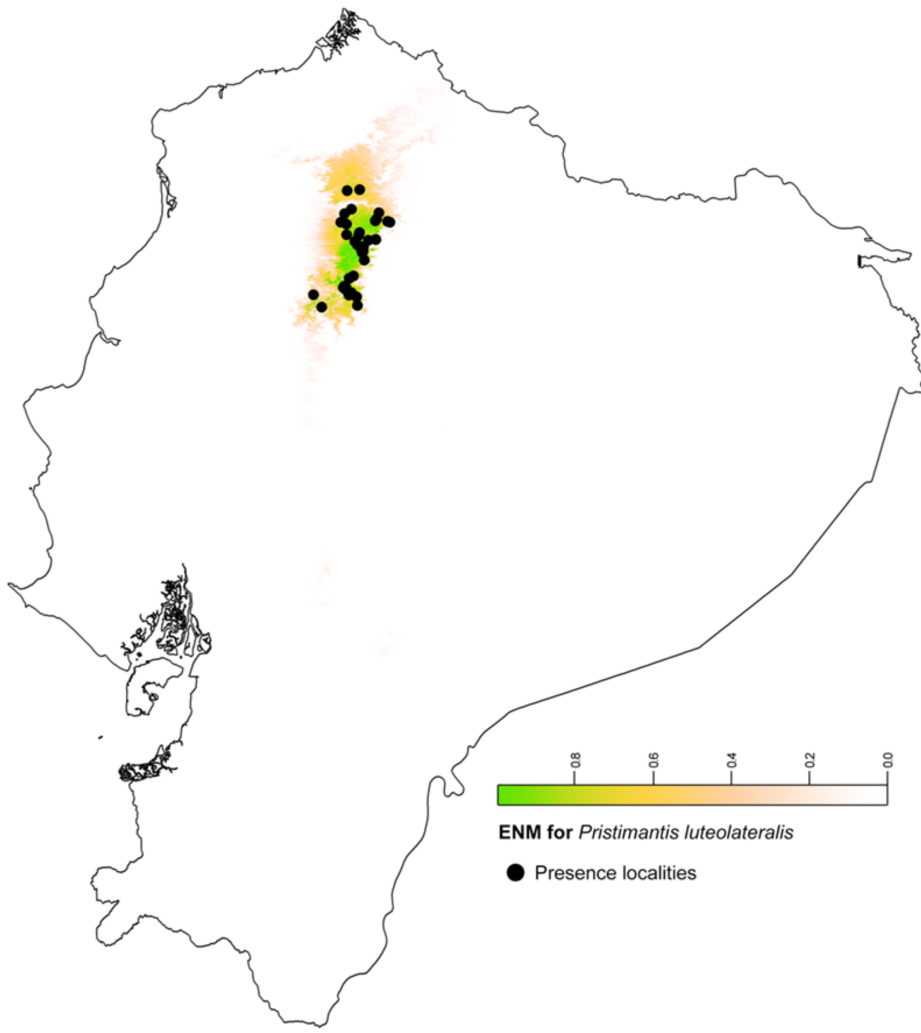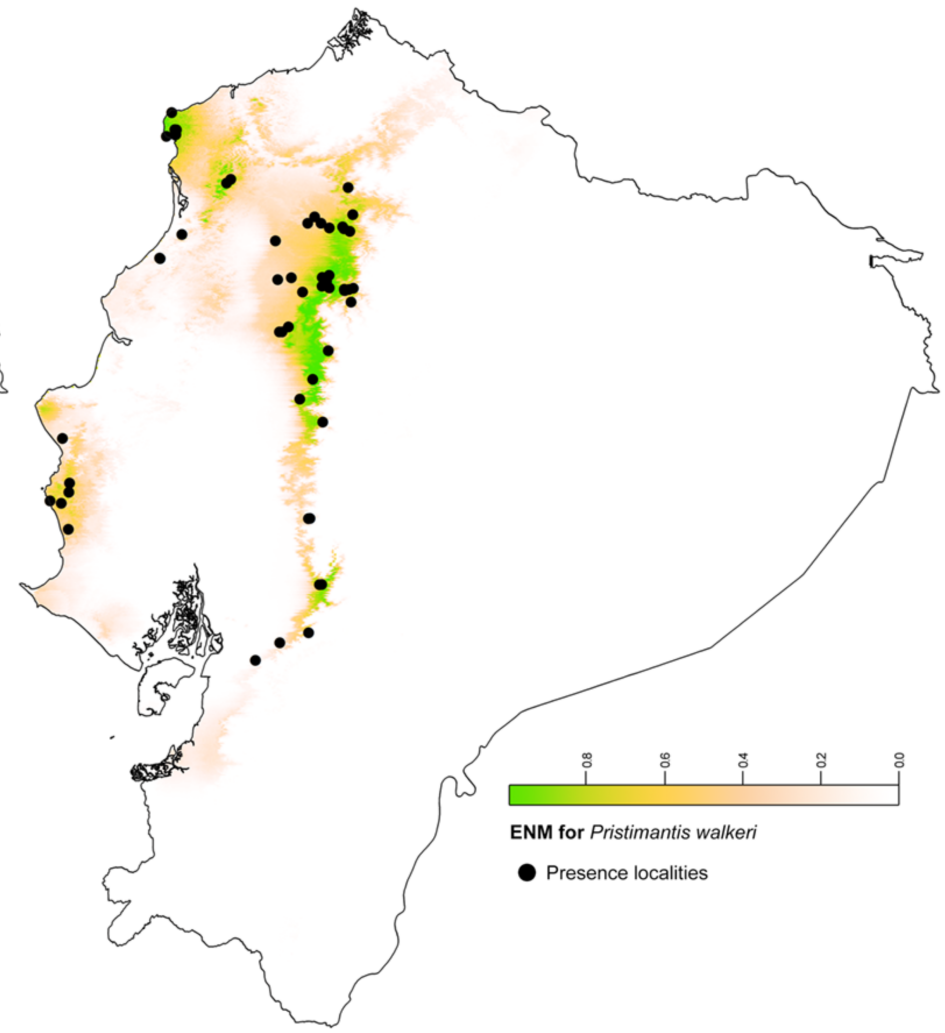

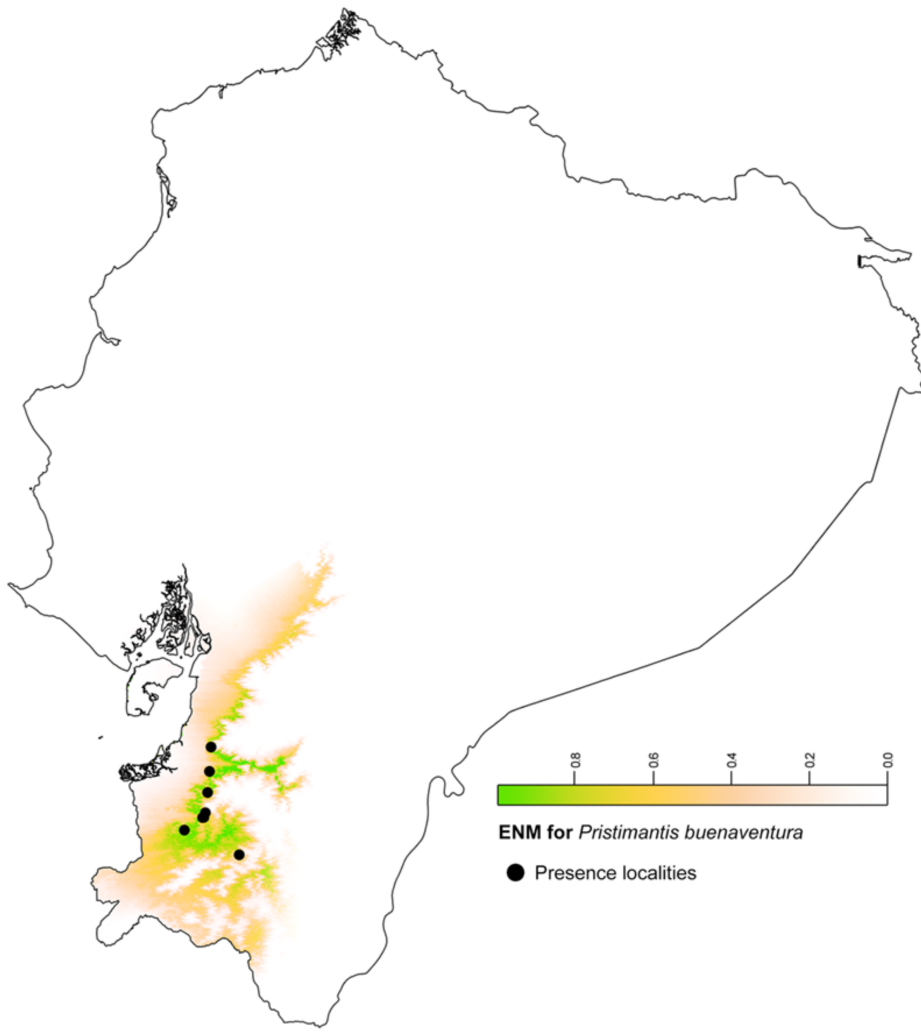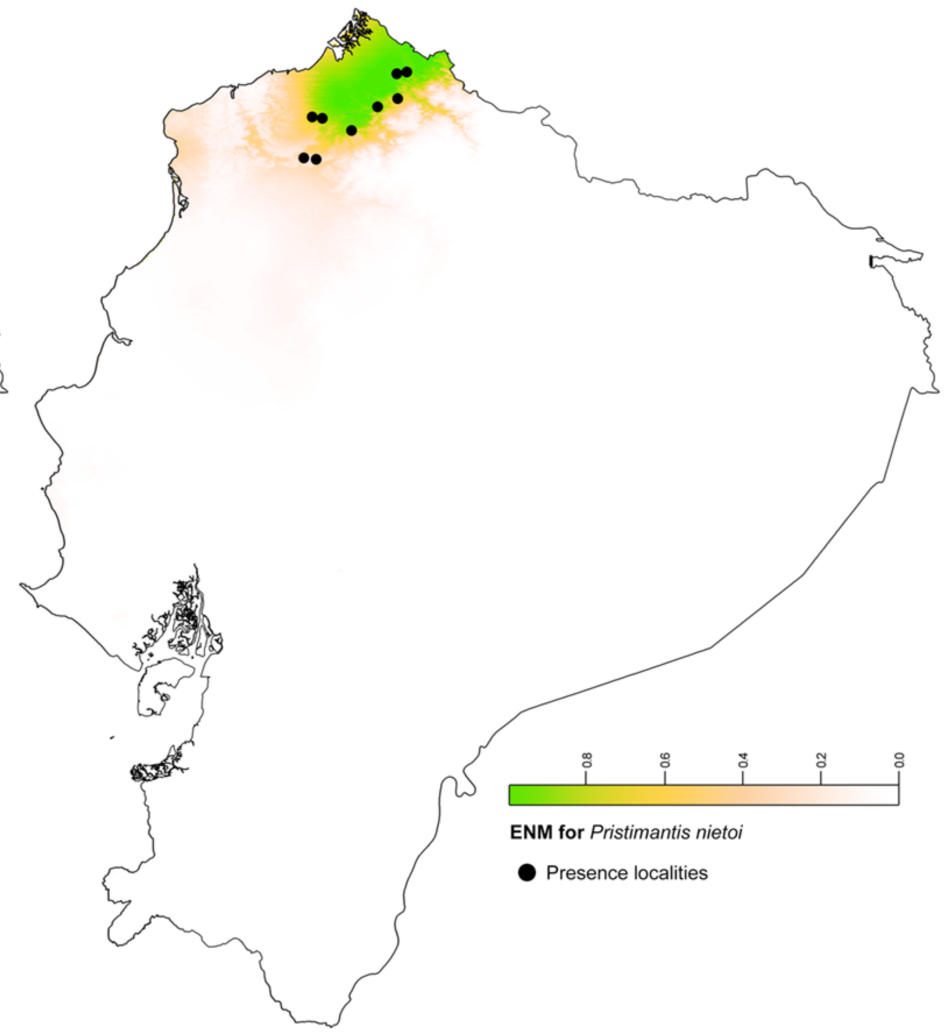

Supplement: pone.0151746.s001.pdf [file pone.0151746.s001.pdf]
